# Supplementary material for: Electrochemical monitoring of colloidal silver nanowires in aqueous samples
Source: Royal Society of Chemistry journal article supplement (doi:10.1039/c5an01264c), 2015-01-01
Supplement: c5an01264c1.pdf [file c5an01264c1.pdf]

## **Electronic Supplementary Information**

### **Electrochemical monitoring of colloidal silver nanowires in aqueous samples**

Cheng Ai Li and Duckjong Kim\*

Department of Nano Mechanics, Korea Institute of Machinery and Materials, 171 Jang-dong,  
Yuseong-gu, Daejeon 305-343, Republic of Korea

\*Corresponding Author. Tel: +82-42-868-7121, E-mail: [dkim@kimm.re.kr](mailto:dkim@kimm.re.kr)

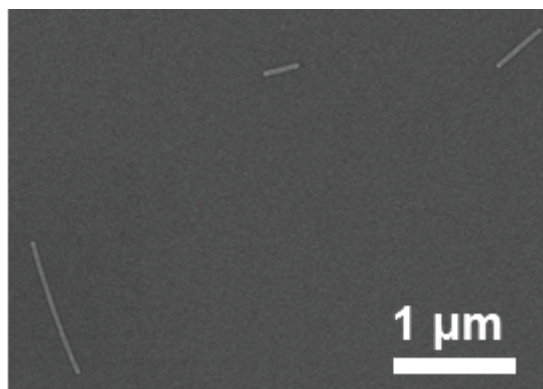

**Fig. S1** SEM image of Ag NWs in filtrate.

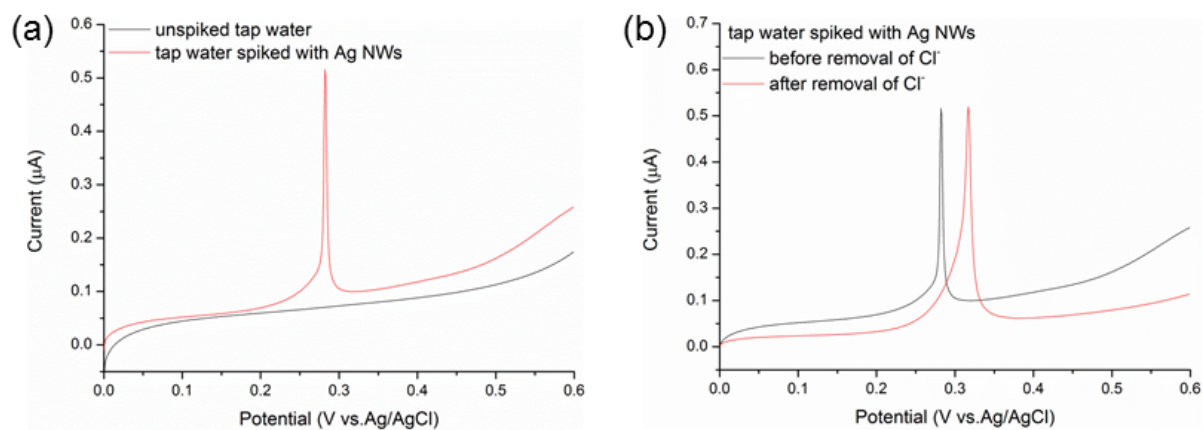

**Fig. S2** (a) Linear sweep voltammograms for tap water with and without Ag NWs at a scan rate of  $20 \text{ mV s}^{-1}$ . (b) Linear sweep voltammograms for tap water spiked with Ag NWs before and after removal of  $\text{Cl}^-$  at a scan rate of  $20 \text{ mV s}^{-1}$ .
